# Supplementary material for: Distinct translatome changes in specific neural populations precede electroencephalographic changes in prion-infected mice
Source: PubMed Central journal article supplement (PMC9401167; doi:10.1371/journal.ppat.1010747), 2022-08-12
Supplement: ppat.1010747.s011.pdf [file ppat.1010747.s011.pdf]

**Table S1. Topological properties of PPI networks.**

|                             | Number of nodes | Number of edges | Size of LCC | Number of connected components | LCC diameter | LCC mean distance |
|-----------------------------|-----------------|-----------------|-------------|--------------------------------|--------------|-------------------|
| <b>Original PPI network</b> | 16181           | 364969          | 15767       | 152                            | 15           | 3.955             |
| <b>Cx43</b>                 | 12800           | 267375          | 12401       | 271                            | 13           | 3.862             |
| <b>Gad2</b>                 | 12636           | 264921          | 12248       | 273                            | 13           | 3.852             |
| <b>vGluT2</b>               | 12557           | 259357          | 12160       | 286                            | 13           | 3.866             |
