# Supplementary material for: Distinct translatome changes in specific neural populations precede electroencephalographic changes in prion-infected mice
Source: PubMed Central journal article supplement (PMC9401167; doi:10.1371/journal.ppat.1010747), 2022-08-12
Supplement: ppat.1010747.s012.pdf [file ppat.1010747.s012.pdf]

**Table S2. Seed gene information and validation results.**

|               | Number of seed genes | Number of seed genes in the PPI network | Observed LCC size | Empirical p-value |
|---------------|----------------------|-----------------------------------------|-------------------|-------------------|
| <b>Cx43</b>   | 137                  | 128                                     | 55                | 0.0048            |
| <b>Gad2</b>   | 83                   | 69                                      | 9                 | 0.0014            |
| <b>vGluT2</b> | 38                   | 33                                      | 4                 | 0.0426            |
